# Supplementary material for: High-Throughput Identification of Promoters and Screening of Highly Active Promoter-5′-UTR DNA Region with Different Characteristics from Bacillus thuringiensis
Source: PubMed Central journal article supplement (PMC3651082; doi:10.1371/journal.pone.0062960), 2013-05-10

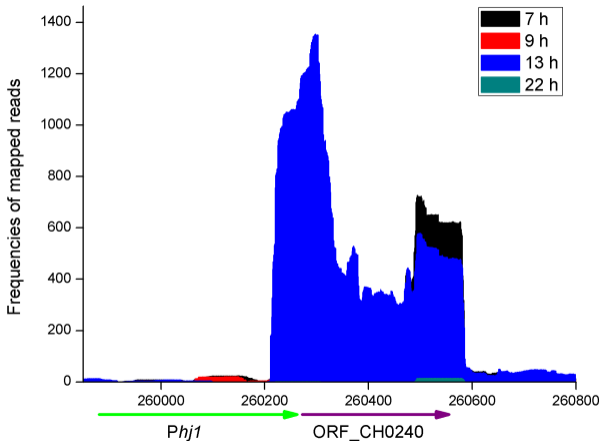

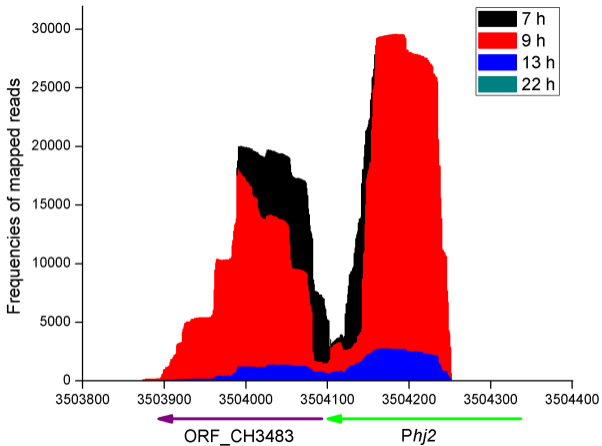

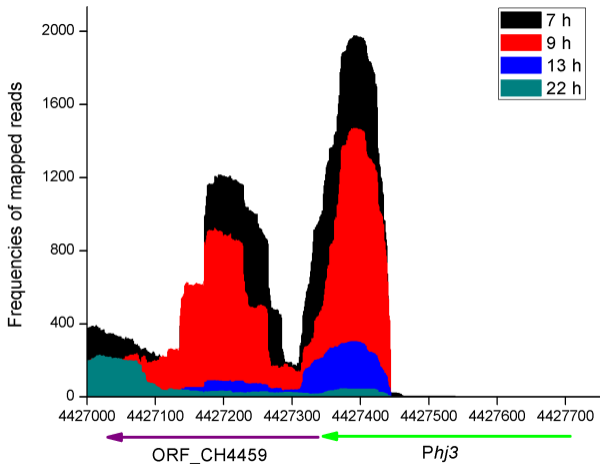

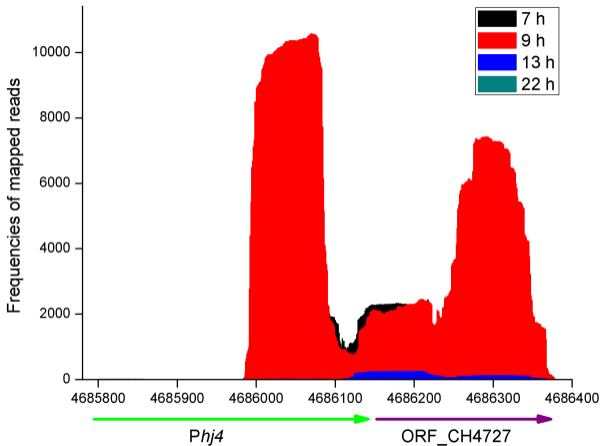

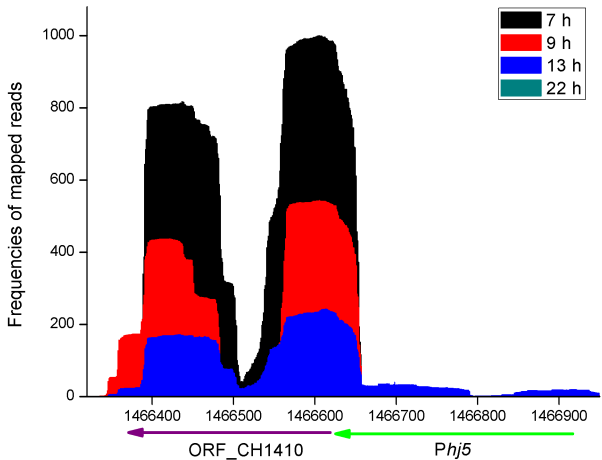

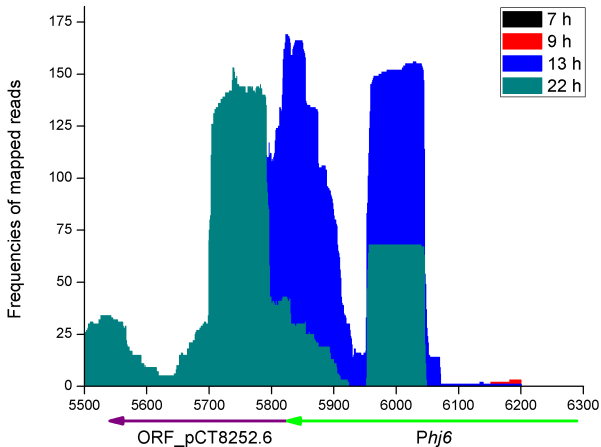

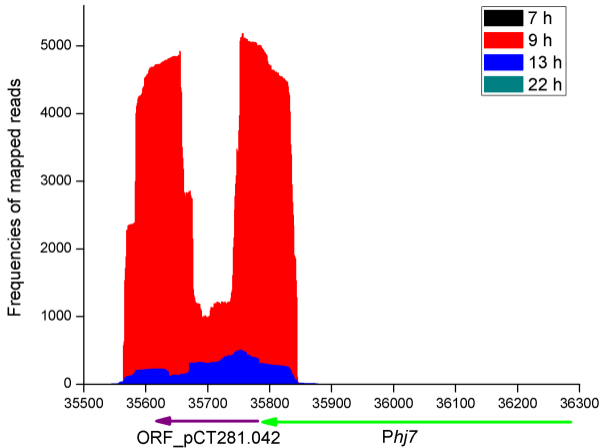

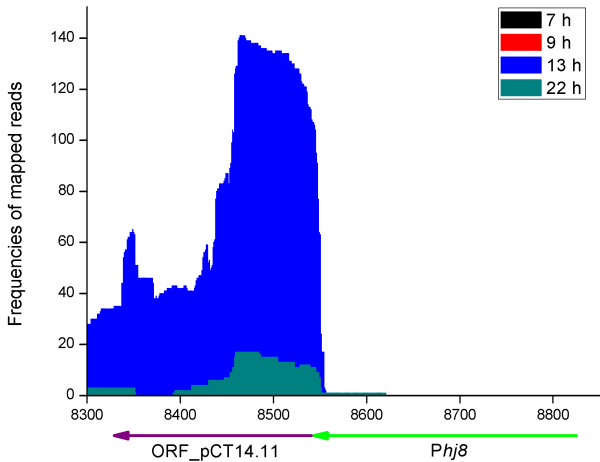



Frequencies of mapped reads

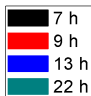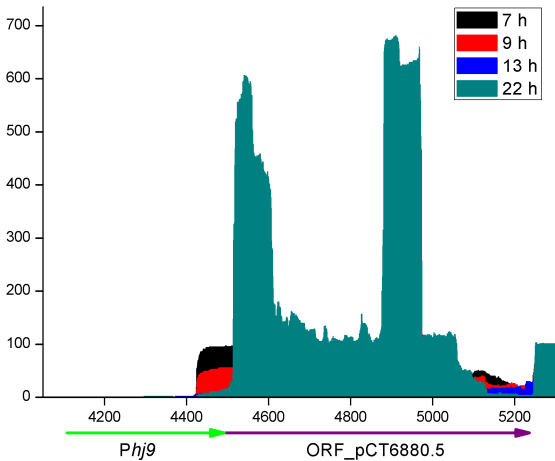

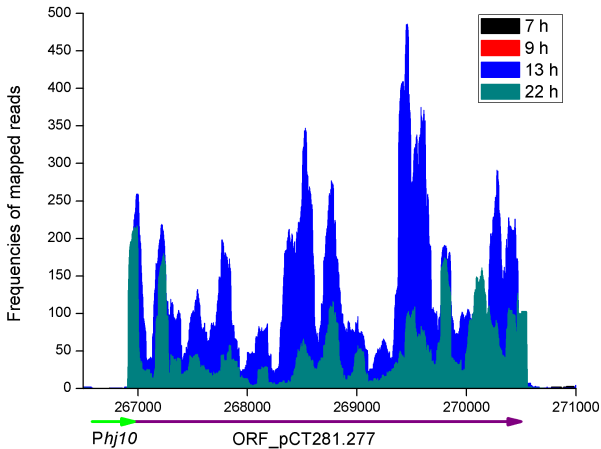

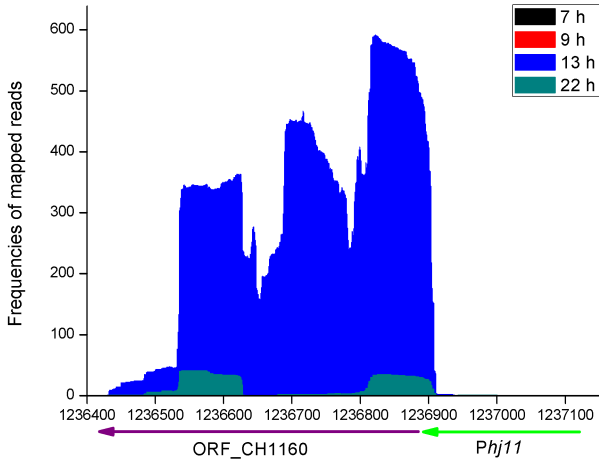

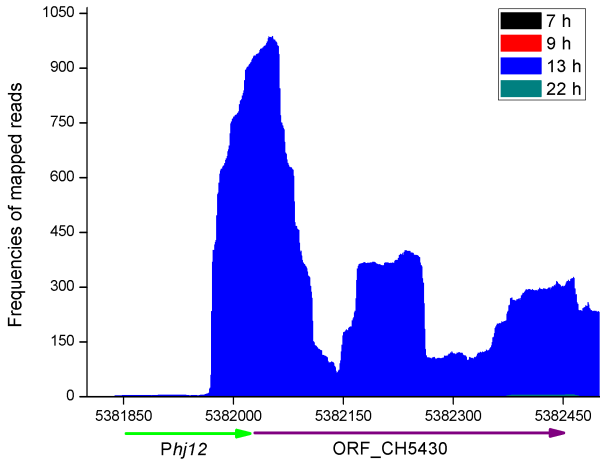

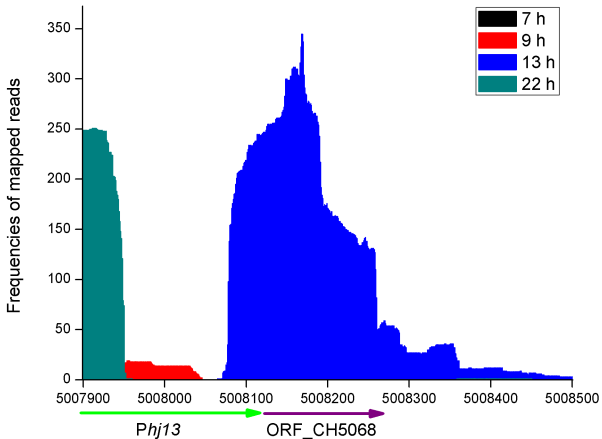

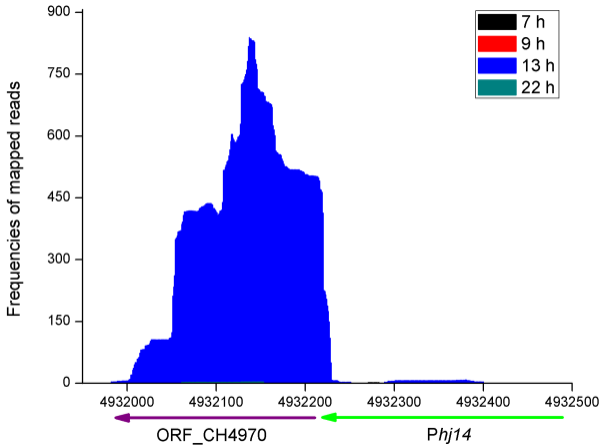

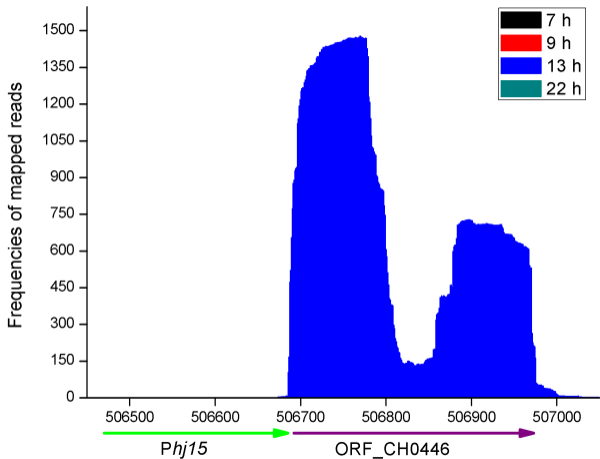

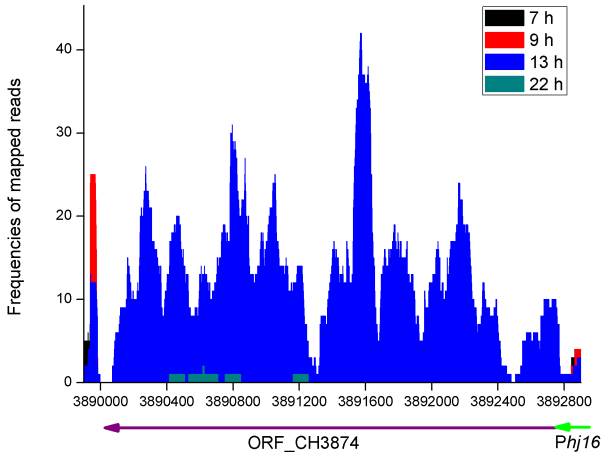



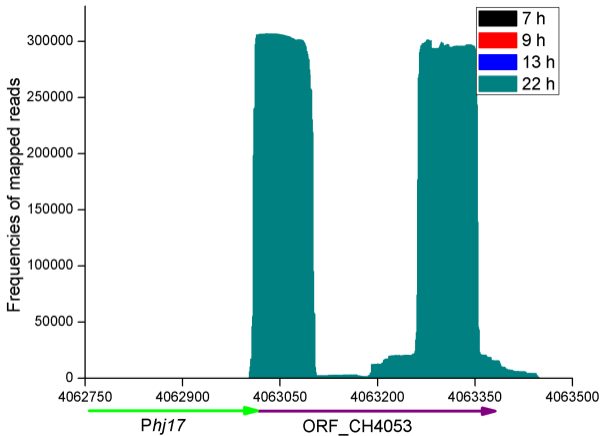

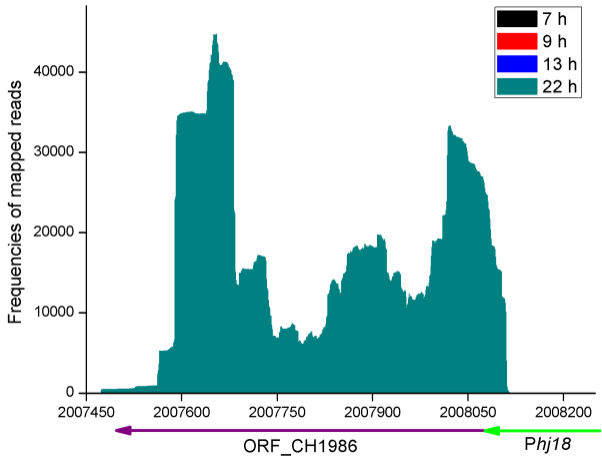

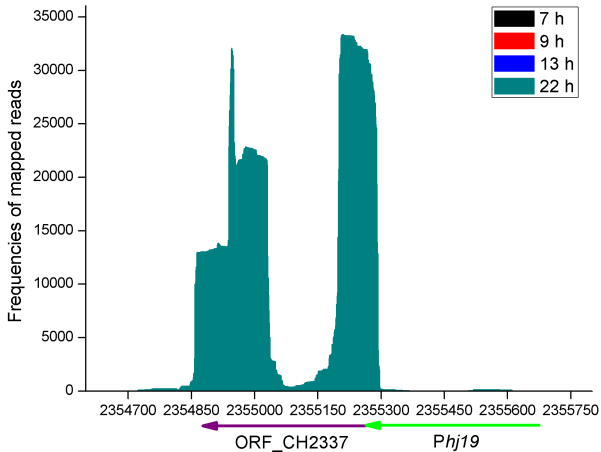

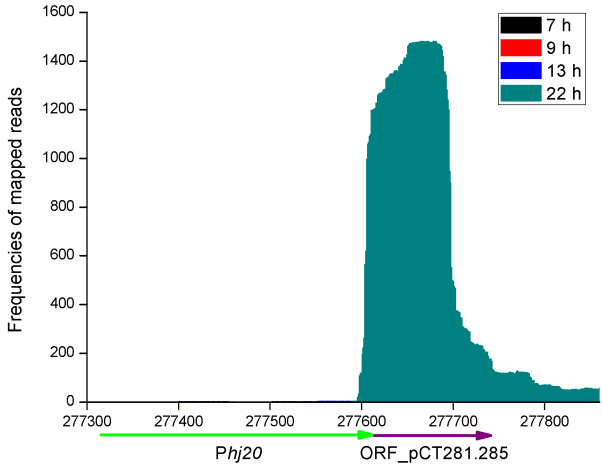

Supplement: pone.0062960.s003.pdf [file pone.0062960.s003.pdf]
